# Supplementary material
Source: PubMed Central journal article supplement (PMC3296872)
Supplement: NIHMS354235-supplement-1_si_001.pdf [file NIHMS354235-supplement-1_si_001.pdf]

Supporting Material for:

**Nuclear Inelastic Scattering and Mössbauer Spectroscopy as  
Local Probes for Ligand Binding Modes and Electronic  
Properties in Proteins: Vibrational Behavior of a Ferriheme  
Center Inside a  $\beta$ -Barrel Protein**

Beate Moeser,<sup>‡</sup> Adam Janoschka,<sup>‡</sup> Juliusz A. Wolny,<sup>‡</sup> Hauke Paulsen,<sup>†</sup> Igor Filippov,<sup>||</sup> Robert E. Berry,<sup>||</sup> Hongjun Zhang,<sup>||</sup> Alexander I. Chumakov,<sup>#</sup> F. Ann Walker,<sup>\*||</sup> and Volker Schünemann<sup>\*‡</sup>

Full Author list of Reference 121:

121. Frisch, H.J.; Trucks, G.W.; Schlegel, H.B.; Scuseria, G.E.; Robb, M.A.; Cheeseman, J.R.; Montgomery, Jr., J.A.; Vreven, T.; Kudin, K.N.; Burant, J.C.; Millam, J.M.; Iyengar, S.S.; Tomasi, J.; Barone, V.; Mennucci, B.; Cossi, M.; Scalmani, G.; Rega, N.; Petersson, G.A.; Nakatsuji, H.; Hada, M.; Ehara, M.; Toyota, K.; Fukuda, R.; Hasegawa, J.; Ishida, M.; Nakajima, T.; Honda, Y.; Kitao, O.; Nakai, H.; Klene, M.; Li, H.; Knox, J.E.; Hratchian, H.P.; Cross, J.B.; Bakken, V.; Adamo, C.; Jaramillo, J.; Gomperts, R.; Stratmann, E.E.; Yazyev, O.; Austin, A.J.; Cammi, R.; Pomelli, C.; Ochterski, J.W.; Ayala, P.Y.; Morokuma, K.; Voth, G.A.; Salvador, P.; Dannenberg, J.J.; Zakrzewski, V.G.; Dapprich, S.; Daniels, A.D.; Strain, M.C.; Farkas, O.; Malick, D.K.; Rabuck, A.D.; Raghavachari, K.; Foresman, J.B.; Ortiz, J.V.; Cui, Q.; Baboul, A.G.; Clifford, S.; Cioslowski, J.; Stefanov, B.B.; Liu, G.; Liashenko, A.; Piskorz, P.; Komaromi, I.; Martin, R.L.; Fox, D.J.; Keith, T.; Al-Laham, M.A.; Peng, C.Y.; Nanayakkara, A.; Challacombe, M.; Gill, P.M.W.; Johnson, B.; Chen, W.; Wong, M.W.; Gonzalez, C.; and Pople, J.A.; Gaussian 03, Revision E.01. Gaussian, Inc., Wallingford, CT, 2004.

**Table S1.** Structural parameters of the iron-ligand-bond in the optimized molecular structures of NP2 on which the calculations of the DOS presented in Figures 9-11 are based and corresponding iron ligand modes.

|        | Fe-Ligand distance [Å] | Fe-Ligand angle [°] | Fe-Ligand vibrations [cm <sup>-1</sup> ]       |
|--------|------------------------|---------------------|------------------------------------------------|
| NP2-NO | 1.639                  | 179.9               | Fe-NO-stretch (666),<br>Fe-N-O-bend (598, 588) |
| NP2-CN | 1.935                  | 179.8               | Fe-CN-stretch (464),<br>Fe-C-N-bend (439)      |
| NP2-Im | 2.003                  |                     |                                                |

**Table S2.** Frequency of calculated normal modes below 100 cm<sup>-1</sup> with a mode composition factor  $e^2 > 0.0001$  as obtained from the QM/MM calculations of NP2-NO with the heme propionates doubly protonated and of NP2-CN and NP2-His with the heme propionates deprotonated

| <u>NP2-NO</u>       |        | <u>NP2-CN</u>       |        | <u>NP2-His</u>      |        |
|---------------------|--------|---------------------|--------|---------------------|--------|
| Frequency           | $e^2$  | Frequency           | $e^2$  | Frequency           | $e^2$  |
| [cm <sup>-1</sup> ] |        | [cm <sup>-1</sup> ] |        | [cm <sup>-1</sup> ] |        |
| 17.498              | 0.0042 | 12.410              | 0.0029 | 21.116              | 0.0080 |
| 35.610              | 0.0041 | 83.083              | 0.0027 | 29.102              | 0.0053 |
| 70.290              | 0.0035 | 73.677              | 0.0026 | 38.778              | 0.0043 |
| 29.434              | 0.0033 | 47.179              | 0.0025 | 13.210              | 0.0040 |
| 72.290              | 0.0033 | 20.750              | 0.0024 | 29.933              | 0.0033 |

|        |        |        |        |        |        |
|--------|--------|--------|--------|--------|--------|
| 71.989 | 0.0032 | 35.242 | 0.0024 | 85,504 | 0.0028 |
| 68.645 | 0.0030 | 76.022 | 0.0024 | 66.196 | 0.0027 |
| 58.182 | 0.0027 | 13.315 | 0.0022 | 41.630 | 0.0026 |
| 37.954 | 0.0026 | 64.325 | 0.0021 | 44.440 | 0.0026 |
| 28.915 | 0.0025 | 72.665 | 0.0021 | 24.746 | 0.0025 |
| 11.393 | 0.0024 | 58.386 | 0.0020 | 27.725 | 0.0025 |
| 39.571 | 0.0024 | 58.852 | 0.0020 | 28.773 | 0.0025 |
| 16.168 | 0.0023 | 69.943 | 0.0020 | 29.128 | 0.0025 |
| 34.010 | 0.0023 | 71.589 | 0.0020 | 30.020 | 0.0025 |
| 37.125 | 0.0023 | 50.683 | 0.0019 | 21.945 | 0.0024 |
| 63.745 | 0.0022 | 60.782 | 0.0019 | 25.231 | 0.0024 |
| 72.161 | 0.0022 | 46.989 | 0.0018 | 30.274 | 0.0024 |
| 58.435 | 0.0020 | 50.829 | 0.0018 | 81.300 | 0.0022 |
| 70.214 | 0.0020 | 52.317 | 0.0018 | 86.709 | 0.0021 |
| 85.774 | 0.0020 | 53.717 | 0.0018 | 95.340 | 0.0021 |
| 60.175 | 0.0019 | 7.786  | 0.0017 | 72.350 | 0.0020 |
| 60.449 | 0.0019 | 15.130 | 0.0017 | 77.022 | 0.0020 |
| 60.755 | 0.0019 | 15.630 | 0.0017 | 87.317 | 0.0020 |
| 18.894 | 0.0018 | 23.715 | 0.0017 | 90.385 | 0.0020 |
| 48.038 | 0.0018 | 24.114 | 0.0017 | 61.343 | 0.0019 |
| 63.461 | 0.0018 | 34.043 | 0.0017 | 64.928 | 0.0019 |
| 14.780 | 0.0017 | 41.932 | 0.0017 | 65.101 | 0.0019 |
| 18.390 | 0.0017 | 43,532 | 0.0017 | 69.136 | 0.0019 |
| 18.559 | 0.0017 | 48.451 | 0.0017 | 75.370 | 0.0019 |
| 19.451 | 0.0017 | 49.306 | 0.0017 | 84.254 | 0.0019 |
| 19.480 | 0.0017 | 51.461 | 0.0017 | 91.966 | 0.0019 |

|        |        |        |        |        |        |
|--------|--------|--------|--------|--------|--------|
| 19.756 | 0.0017 | 10.710 | 0.0016 | 18.025 | 0.0018 |
| 20.891 | 0.0017 | 12.724 | 0.0016 | 19.692 | 0.0018 |
| 21.274 | 0.0017 | 15.296 | 0.0016 | 32.716 | 0.0018 |
| 21.418 | 0.0017 | 19.208 | 0.0016 | 35.072 | 0.0018 |
| 21.678 | 0.0017 | 19.911 | 0.0016 | 36.549 | 0.0018 |
| 21.978 | 0.0017 | 21,474 | 0.0016 | 36.977 | 0.0018 |
| 33.529 | 0.0017 | 21.591 | 0.0016 | 37.359 | 0.0018 |
| 36.149 | 0.0017 | 22.292 | 0.0016 | 37.715 | 0.0018 |
| 39.423 | 0.0017 | 23.109 | 0.0016 | 38.625 | 0.0018 |
| 39.817 | 0.0017 | 24,674 | 0.0016 | 40.755 | 0.0018 |
| 41.304 | 0.0017 | 25.387 | 0.0016 | 42.449 | 0.0018 |
| 44.971 | 0.0017 | 25.665 | 0.0016 | 46.144 | 0.0018 |
| 46.513 | 0.0017 | 26.335 | 0.0016 | 46.400 | 0.0018 |
| 47.322 | 0.0017 | 26.938 | 0.0016 | 48.128 | 0.0018 |
| 47.569 | 0.0017 | 26.991 | 0.0016 | 50.065 | 0.0018 |
| 49.952 | 0.0017 | 27.451 | 0.0016 | 50.816 | 0.0018 |
| 58.745 | 0.0017 | 29.435 | 0.0016 | 51.080 | 0.0018 |
| 6.094  | 0.0016 | 29.856 | 0.0016 | 53.344 | 0.0018 |
| 13.393 | 0.0016 | 31.669 | 0.0016 | 55.651 | 0.0018 |
| 13.477 | 0.0016 | 32.605 | 0.0016 | 55.916 | 0.0018 |
| 14.477 | 0.0016 | 33.867 | 0.0016 | 56.839 | 0.0018 |
| 16.319 | 0.0016 | 34,538 | 0.0016 | 68.761 | 0.0018 |
| 22.660 | 0.0016 | 36.256 | 0.0016 | 73.020 | 0.0018 |
| 22.895 | 0.0016 | 39.882 | 0.0016 | 87.396 | 0.0017 |

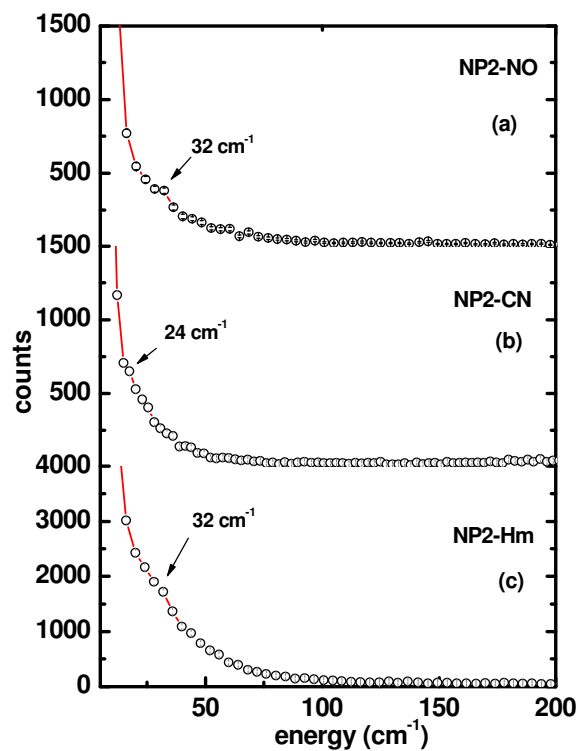

**Figure S1:** Low-energy region of the NIS spectra displayed in Fig. 1 of the text, with indicated peaks at very low energies.

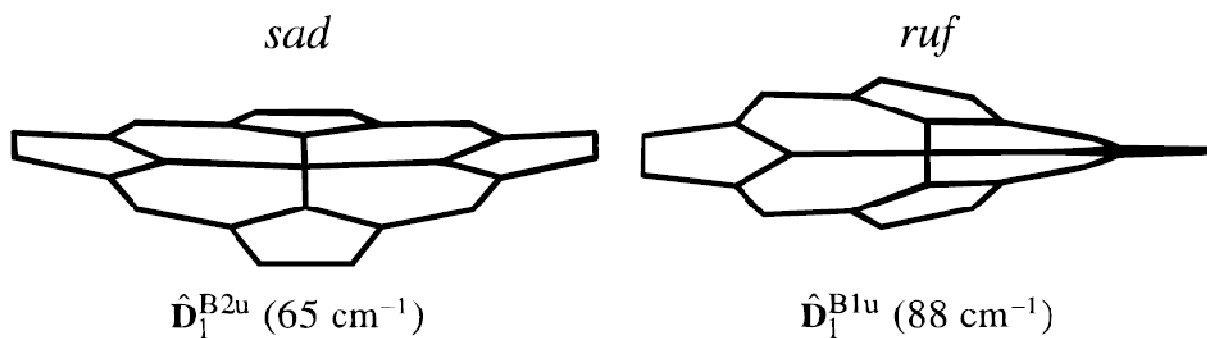

**Figure S2.** Schematic representation of a saddling (*sad*,  $B_{2u}$ ) and ruffling (*ruf*,  $B_{1u}$ ) mode of a porphyrin ring with ideal  $D_{4h}$  symmetry. The graphic is taken from Jentzen et al.<sup>S1</sup>

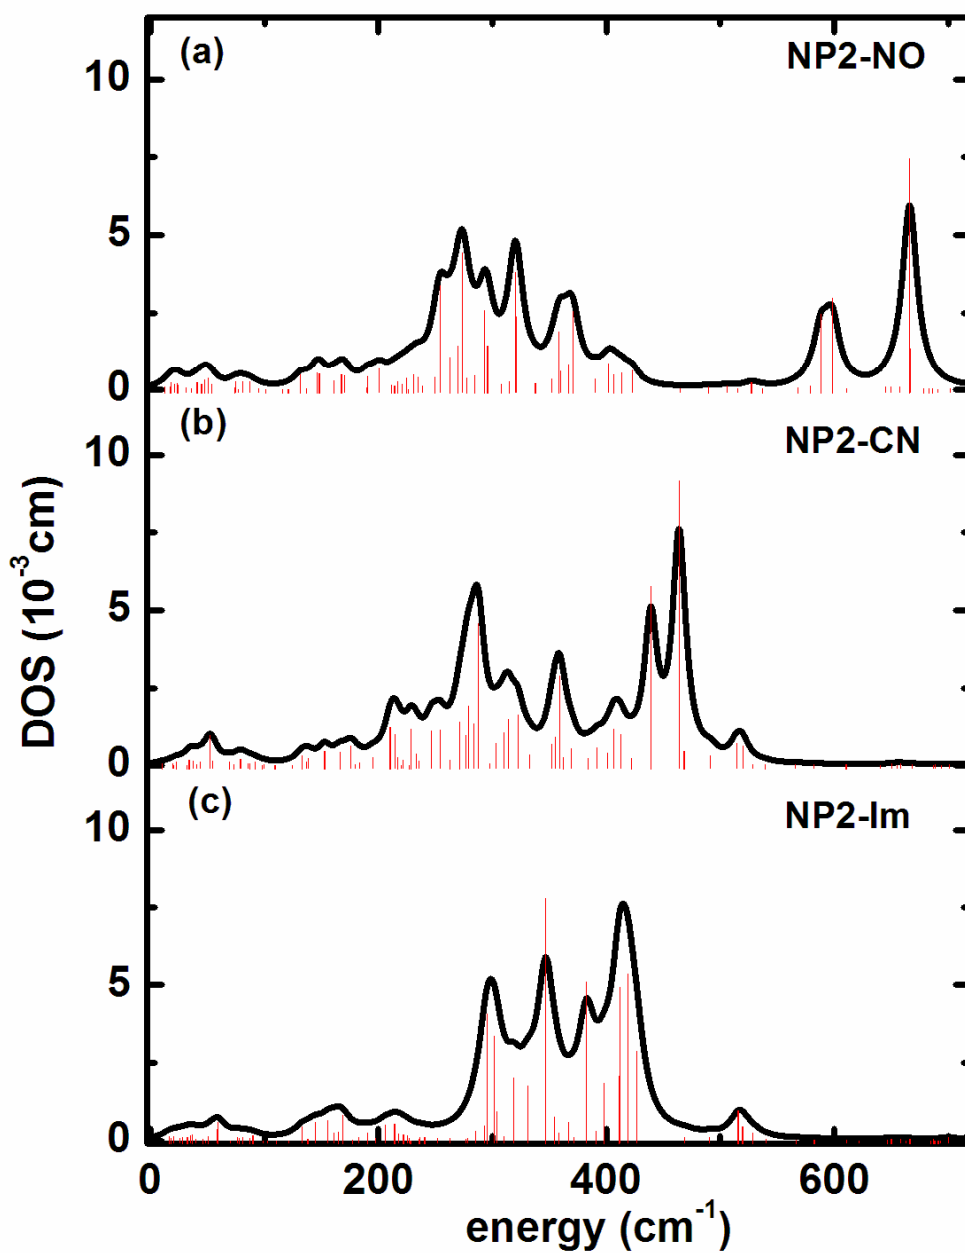

**Figure S3.** Iron vibrational density of states calculated on the basis of the optimized molecular structures of the isolated heme complexes shown in figure 7a-c. The bar graphs display the mode composition factor  $e^2$ , normalized such that the highest value in each graph is 0.06.

## Reference

---

S1. Jentzen, W.; Song, X.; Shelnut, J. A. *J. Phys. Chem. B.* **1997**, *101*, 1684-1699.

13 Movies are attached below in one zipped folder. To open these movies, use your favorite web browser.

*Mov1\_NP2\_NO\_630.gif*

Normal mode at 630 cm<sup>-1</sup> for NP2-NO calculated using the ONIOM approach and protonated heme carboxylates, only the layer calculated by DFT is shown.

*Mov2\_NP2\_NO\_591.gif*

Normal mode at 591 cm<sup>-1</sup> for NP2-NO calculated using the ONIOM approach and protonated heme carboxylates, only the layer calculated by DFT is shown.

*Mov3\_NP2\_NO\_582.gif*

Normal mode at 582 cm<sup>-1</sup> for NP2-NO calculated using the ONIOM approach and protonated heme carboxylates, only the layer calculated by DFT is shown.

*Mov4\_NP2\_NO\_70.gif*

Normal mode at 70 cm<sup>-1</sup> for NP2-NO calculated using the ONIOM approach and protonated heme carboxylates.

*Mov5\_NP2\_NO\_17.gif*

Normal mode at 17 cm<sup>-1</sup> for NP2-NO calculated using the ONIOM approach and protonated heme carboxylates.

*Mov6\_NP2\_CN\_455.gif*

Normal mode at 455 cm<sup>-1</sup> for NP2-CN calculated using the ONIOM approach and deprotonated heme carboxylates, only the layer calculated by DFT is shown.

---

*Mov7\_NP2\_CN\_451.gif*

Normal mode at 451 cm<sup>-1</sup> for NP2-CN calculated using the ONIOM approach and deprotonated heme carboxylates, only the layer calculated by DFT is shown.

*Mov8\_NP2\_CN\_83.gif*

Normal mode at 83 cm<sup>-1</sup> for NP2-CN calculated using the ONIOM approach and deprotonated heme carboxylates.

*Mov9\_NP2\_CN\_12.gif*

Normal mode at 12 cm<sup>-1</sup> for NP2-CN calculated using the ONIOM approach and deprotonated heme carboxylates.

*Mov10\_NP2\_Im\_422.gif*

Normal mode at 422 cm<sup>-1</sup> for NP2-Im calculated using the ONIOM approach and deprotonated heme carboxylates, only the layer calculated by DFT is shown.

*Mov11\_NP2\_Im\_389.gif*

Normal mode at 389 cm<sup>-1</sup> for NP2-Im calculated using the ONIOM approach and deprotonated heme carboxylates, only the layer calculated by DFT is shown.

*Mov12\_NP2\_Im\_383.gif*

Normal mode at 383 cm<sup>-1</sup> for NP2-Im calculated using the ONIOM approach and deprotonated heme carboxylates, only the layer calculated by DFT is shown.

*Mov13\_NP2\_Im\_21.gif*

Normal mode at 21 cm<sup>-1</sup> for NP2-Im calculated using the ONIOM approach and deprotonated heme carboxylates.
